# Supplementary material
Source: PubMed Central journal article supplement (PMC4632968)
Supplement: NIHMS699687-supplement-2.pdf [file NIHMS699687-supplement-2.pdf]

**Table S1. T cell Product Release Criteria**

| <b>Release Test</b>                                           | <b>Test Methodology</b>                                                                              | <b>Criteria for Passing</b>                                                                             |
|---------------------------------------------------------------|------------------------------------------------------------------------------------------------------|---------------------------------------------------------------------------------------------------------|
| <b>Viability</b>                                              | Guava counts*                                                                                        | >75% viability                                                                                          |
| <b>Plasmid vector copy number</b>                             | Southern w/HyTK-specific probe                                                                       | Single band                                                                                             |
| <b>IL-13 zetakine expression</b>                              | Western w/CD3 $\zeta$ -specific antibody                                                             | Unique 66kDa band                                                                                       |
| <b>Surface phenotype</b>                                      | Flow cytometry                                                                                       | Uniformly IL-13 <sup>+</sup> , TCR $\alpha\beta$ <sup>+</sup> , CD8 <sup>+</sup> , and CD4 <sup>-</sup> |
| <b>IL-13R<math>\alpha</math>2-specific cytolytic activity</b> | 4hr <sup>51</sup> Cr release assay                                                                   | $\geq$ 25% specific lysis at E:T of 5:1                                                                 |
| <b>Sensitivity to ganciclovir</b>                             | 14-day culture, trypan blue dye exclusion                                                            | <15% of control viable cell #                                                                           |
| <b>Antigen/IL-2 dependent growth</b>                          | <sup>3</sup> H-TdR uptake assay                                                                      | <10% of Jurkat c.p.m.                                                                                   |
| <b>Sterility</b>                                              | Bacterial and fungal growth media<br>Gen-Probe mycoplasma detection<br>Endotoxin ELISA<br>Gram stain | Negative cultures<br>Negative mycoplasma<br>< 5 EU/kg<br>Negative gram stain                            |

**Table S2. Manufacturing Feasibility**

| <b>UPN#</b> | <b>Gender</b> | <b>Age at enrollment (yrs)</b> | <b>Cell Product Notes</b>                      | <b>Other Notes</b>                                                                                                                                                                                               |
|-------------|---------------|--------------------------------|------------------------------------------------|------------------------------------------------------------------------------------------------------------------------------------------------------------------------------------------------------------------|
| <b>024</b>  | Female        | 60                             | Successfully cryopreserved                     | Before product released, patient ineligible to receive T cells due to progression requiring alternative medical, radiation or surgical intervention.                                                             |
| <b>025</b>  | Male          | 62                             | Successfully cryopreserved and released        | Patient ineligible to receive T cells due to progression requiring alternative medical, radiation or surgical intervention.                                                                                      |
| <b>026</b>  | Male          | 47                             | Successfully cryopreserved and released        | Protocol closed to treatment prior to recurrence of disease.                                                                                                                                                     |
| <b>027</b>  | Male          | 50                             | Successfully cryopreserved and released        | Patient expired with disease progression prior to receiving T cells.                                                                                                                                             |
| <b>028</b>  | <b>Female</b> | <b>57</b>                      | <b>Successfully cryopreserved and released</b> | <b>Received 11 of 12 infusions – day 1 of cycle 3 skipped due to transient worsening of headache.</b><br>Patient off study due to progression requiring alternative medical, radiation or surgical intervention. |
| <b>029</b>  | Female        | 29                             | Successfully cryopreserved                     | Before product released, patient ineligible to receive T cells due to steroid dependence.                                                                                                                        |
| <b>030</b>  | Male          | 56                             | Successfully cryopreserved and released        | Patient ineligible to receive T cells due to steroid dependence.                                                                                                                                                 |
| <b>031</b>  | <b>Female</b> | <b>36</b>                      | <b>Successfully cryopreserved and released</b> | <b>Received 12 infusions.</b><br>Patient off study due to progression requiring alternative medical, radiation or surgical intervention.                                                                         |
| <b>032</b>  | Female        | 65                             | Leukapheresed, but no product made             | Patient ineligible to receive T cells due to progression requiring alternative medical, radiation or surgical intervention.                                                                                      |
| <b>033</b>  | <b>Male</b>   | <b>57</b>                      | <b>Successfully cryopreserved and released</b> | <b>Received 12 infusions.</b><br>Patient off study due to progression requiring alternative medical, radiation or surgical intervention.                                                                         |
| <b>034</b>  | Female        | 22                             | Successfully cryopreserved and released        | Protocol closed to treatment prior to recurrence of disease.                                                                                                                                                     |
| <b>036</b>  | Female        | 47                             | Successfully cryopreserved and released        | Voluntary withdrawal at time of progression.                                                                                                                                                                     |
| <b>038</b>  | Female        | 37                             | Successfully cryopreserved and released        | Protocol closed to treatment prior to recurrence of disease.                                                                                                                                                     |

**Table S3. Characteristics of Patients Who Received Study Treatment**

| <b>UPN#</b> | <b>Gender</b> | <b>Age at enrollment (yrs)</b> | <b>Histology at diagnosis</b> | <b>Histology at Recurrence</b>        | <b>Prior Therapies</b>                                                | <b>KPS at Recurrence</b> |
|-------------|---------------|--------------------------------|-------------------------------|---------------------------------------|-----------------------------------------------------------------------|--------------------------|
| <b>028</b>  | Female        | 57                             | Grade II oligodendroglioma    | GBM with oligodendroglioma components | Surgery (x2)<br>BCNU Wafers<br>BCNU i.v.<br>Radiation<br>Temozolomide | 90%                      |
| <b>031</b>  | Female        | 36                             | GBM                           | GBM                                   | Surgery<br>Radiation<br>Temozolomide                                  | 90%                      |
| <b>033</b>  | Male          | 57                             | GBM                           | GBM                                   | Surgery<br>Radiation<br>Temozolomide                                  | 90%                      |
