# Supplementary material
Source: PubMed Central journal article supplement (PMC4632968)
Supplement: NIHMS699687-supplement-5.pdf [file NIHMS699687-supplement-5.pdf]

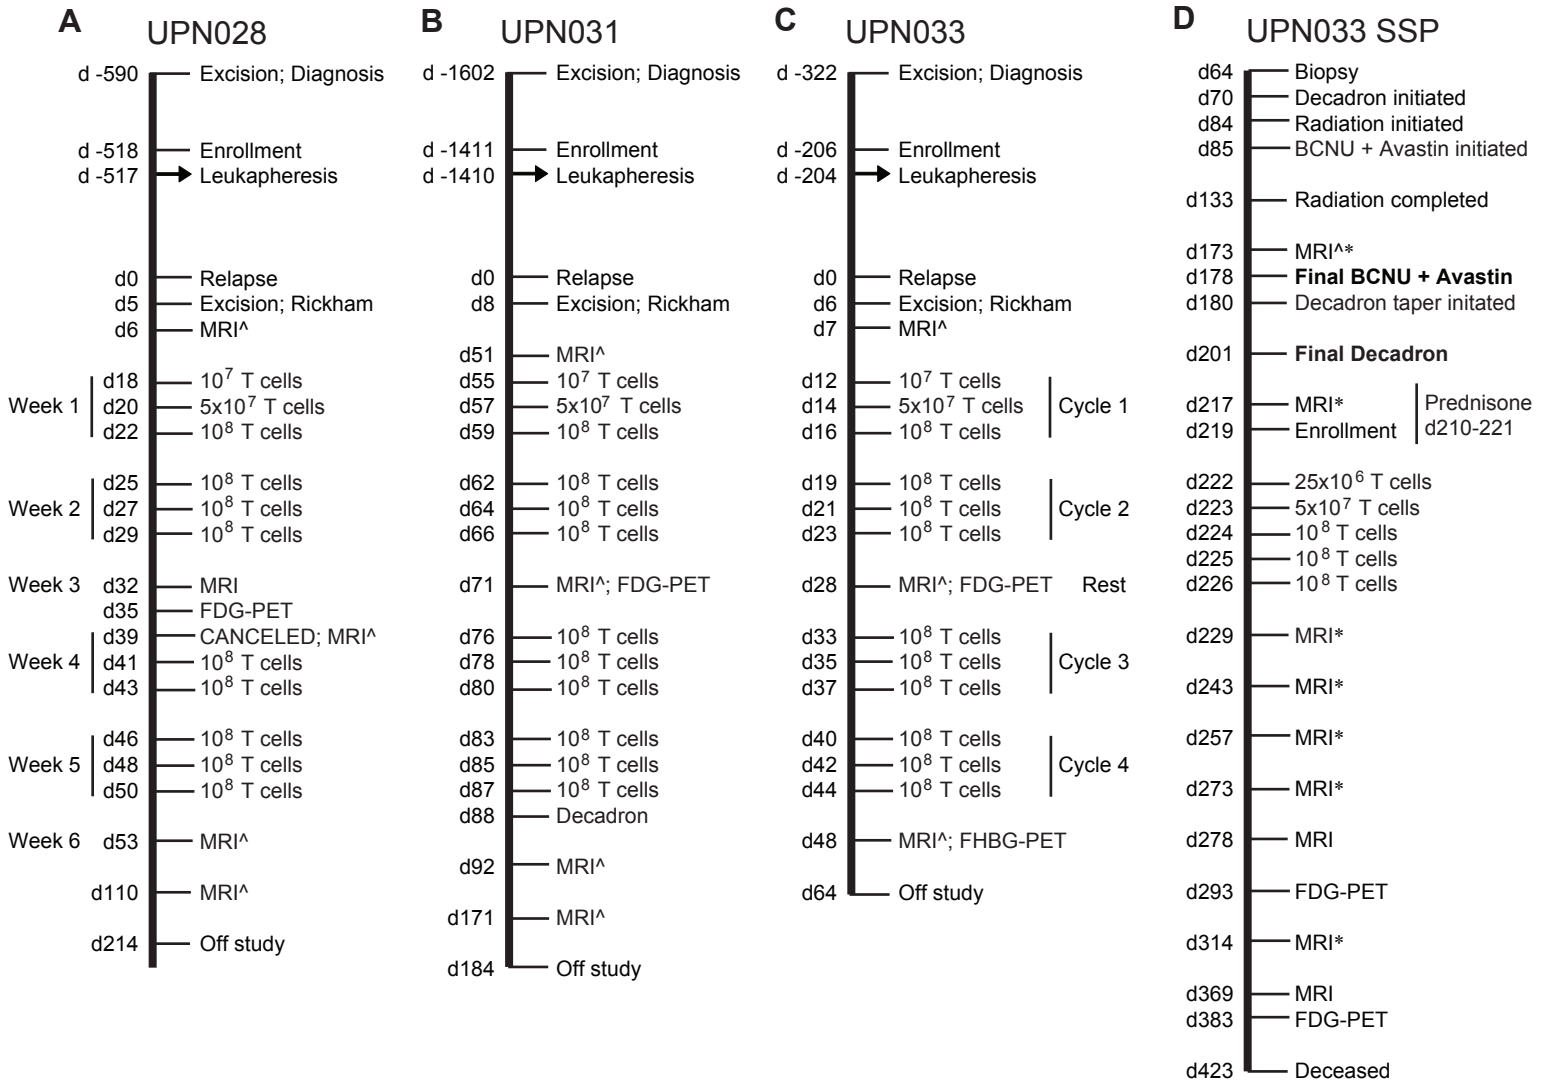

**Fig. S3. Treatment regimens for each patient, with relapse designated day 0.** MRI, magnetic resonance imaging; FDG- or FHBG-PET; fluoro-2-deoxy-D-glucose or 9-[4-fluoro-3-(hydroxymethyl)butyl]guanine positron emission tomography; BCNU, 1,3-bis(2-chloroethyl)-1-nitrosourea; SSP, single subject protocol. <sup>^</sup>, MRI images that are depicted in Fig. 3; \*, MRI measurements that are graphed in Fig. 5B.
