# Supplementary material
Source: PubMed Central journal article supplement (PMC4632968)

**Fig. S2. Consort flow diagram.**

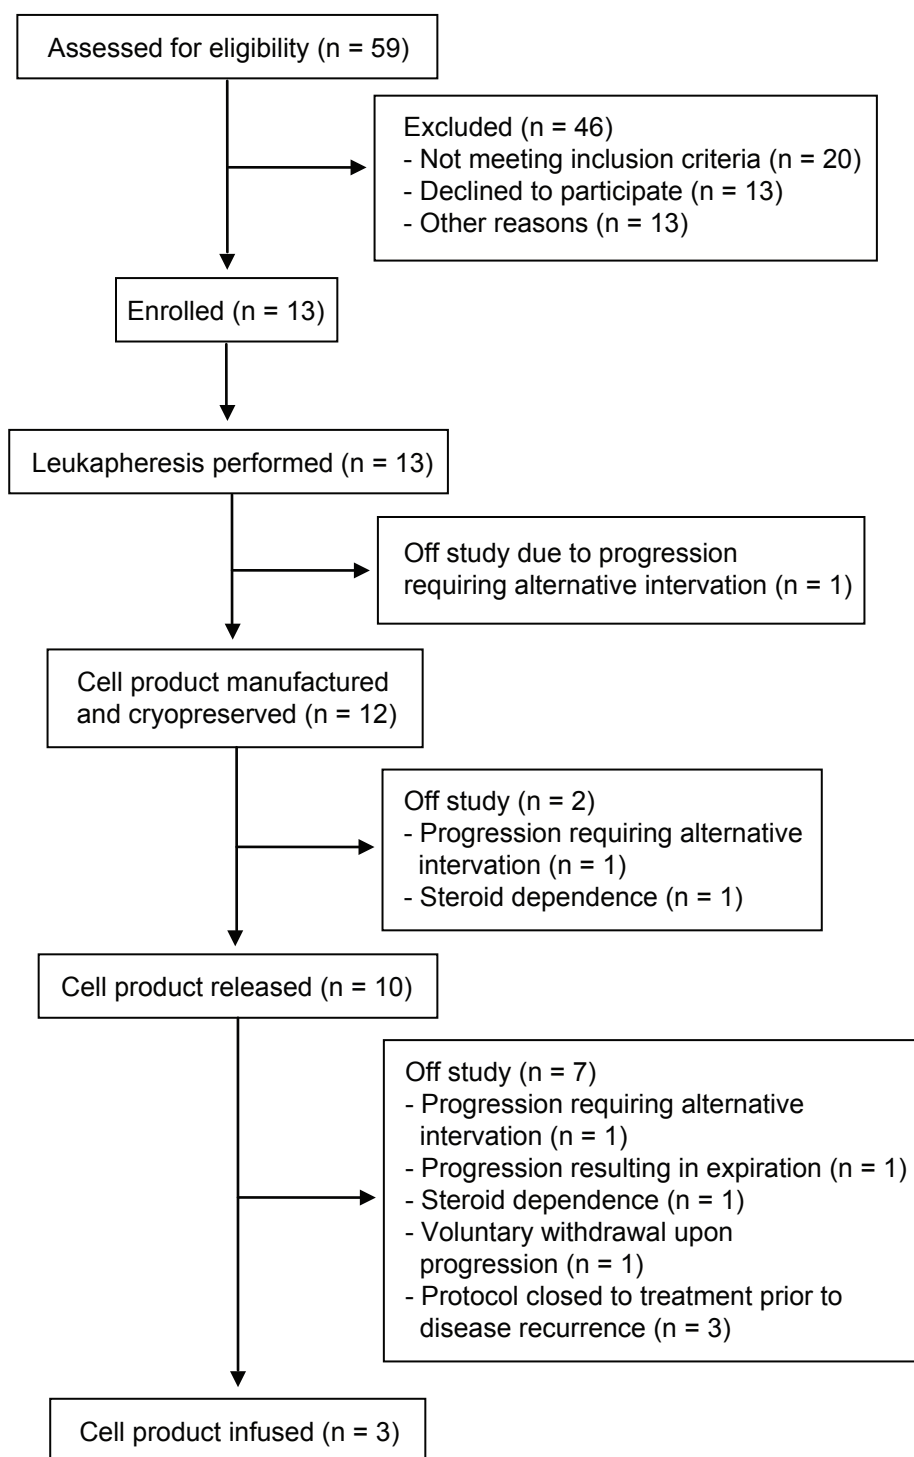

Supplement: NIHMS699687-supplement-4.pdf [file NIHMS699687-supplement-4.pdf]
